# Supplementary material for: DNA damage response markers are differentially expressed in BRCA-mutated breast cancers
Source: Springer Nature journal article supplement (doi:10.1007/s10549-015-3306-6), 2015-02-01
Supplement: MOESM4 [file 8846972]

**Supplementary Table 3:** DNA repair markers in sporadic and *BRCA*1-mutated triple-negative breast cancer

| **DNA repair marker** |  | ***BRCA*1 mutated cancer**  **(n=31)** | **Sporadic cancer**  **(n=297)** | **p value** |
| --- | --- | --- | --- | --- |
| **BARD1** | Negative | 15 (50.0) | 0 | **<0.001** |
|  | Positive | 15 (50.0) | 297 (100) |  |
|  |  |  |  |  |
| **BRCA1 (nuclear)** | Negative | 22 (75.9) | 158 (66.1) | NS |
| Positive | 7 (24.1) | 81 (33.9) |  |
|  |  |  |  |  |
| **BRCA2 (nuclear)** | Negative | 20 (80.0) | 155 (89.6) | NS |
| Positive | 5 (20.0) | 18 (10.4) |  |
|  |  |  |  |  |
| **Ku70/Ku80** | Negative | 1 (3.6) | 23 (12.8) | NS |
|  | Positive | 27 (96.4) | 156 (87.2) |  |
|  |  |  |  |  |
| **P53** | Negative | 21 (72.4) | 126 (43.0) | **0.002** |
|  | Positive | 8 (27.6) | 167 (57.0) |  |
|  |  |  |  |  |
| **PARP1 (non- cleaved)** | Negative | 3 (9.7) | 86 (47.3) | **<0.001** |
| Positive | 28 (90.3) | 96 (52.7) |  |
|  |  |  |  |  |
| **PARP1 (cleaved)** | Negative | 0 | 6 (3.0) | NS |
| Positive | 30 (100) | 196 (97.0) |  |
|  |  |  |  |  |
| **RAD51** | Negative | 22 (81.5) | 110 (71.0) | NS |
|  | Positive | 5 (18.5) | 45 (29.0) |  |
